# Supplementary material
Source: Research Square preprint supplement (doi:10.21203/rs.3.rs-6662441/v1)
Supplement: Supplementary file 1 [file 40d289a9378265e27a8ecfc4.docx]

Dear Participants,

This questionnaire is conducted as part of a research study aiming to explore pre-service English language teachers’ views and reflections about teaching disposition and their development as future teachers. Your participation in this interview is entirely voluntary. Before participating, please note that all information you share will be kept confidential and used only for academic research purposes. Your responses will be anonymized, and no personal identifying information will be included in any reports or publications. You may choose not to answer any question or withdraw from the interview at any time without any negative consequences. By agreeing to participate, you confirm that you have been informed about the purpose of the study, understand your rights as a participant, and voluntarily consent to take part in this study.

Thank you for your valuable contribution.

Dr. Gülten Genç

**Appendix A. Teacher Disposition Index**

**Please indicate your level of agreement with each statement using the following scale:**
1 = Strongly Disagree  2 = Disagree  3 = Neutral  4 = Agree  5 = Strongly Agree

1. I believe a teacher must use a variety of instructional strategies to optimize student learning.
2. I understand that students learn in many different ways.
3. I demonstrate qualities of humor, empathy, and warmth with others.
4. I am a thoughtful and responsive listener.
5. I assume responsibility when working with others.
6. I am committed to critical reflection for my professional growth.
7. I believe that all students can learn.
8. I cooperate with colleagues in planning instruction.
9. I actively seek out professional growth opportunities.
10. I uphold the laws and ethical codes governing the teaching profession.
11. I stimulate students’ interests.
12. I believe it is important to involve all students in learning.
13. I value both long-term and short-term planning.
14. I stay current with the evolving nature of the teaching profession.
15. I select material that is relevant for students.
16. I believe the classroom environment a teacher creates greatly affects students’ learning and development.
17. I am successful in facilitating learning for all students.
18. I demonstrate and encourage democratic interaction in the classroom and school.
19. I accurately read the non-verbal communication of students.
20. I engage in discussions about new ideas in the teaching profession.
21. I view teaching as an important profession.
22. I select material that is interesting for students.
23. I provide appropriate feedback to encourage students in their development.
24. I understand that teachers’ expectations impact student learning.
25. I view teaching as a collaborative effort among educators.
26. I engage in research-based teaching practices.
27. I create connections to subject matter that are meaningful to students.
28. I understand students have certain needs that must be met before learning can take place.
29. I am sensitive to student differences.
30. I communicate caring, concern, and a willingness to become involved with others.
31. I listen to colleagues’ ideas and suggestions to improve instruction.
32. I take initiative to promote ethical and responsible professional practice.
33. I am punctual and reliable in my attendance.
34. I maintain a professional appearance.
35. I believe it is my job to create a learning environment that is conducive to the development of students’ self-confidence and competence.
36. I respect the cultures of all students.
37. I communicate effectively with students, parents, and colleagues.
38. I honor my commitments.
39. I treat students with dignity and respect at all times.
40. I work well with others in implementing a common curriculum.
41. I am willing to receive feedback and assessment of my teaching.
42. I am patient when working with students.
43. I am open to adjusting and revising my plans to meet student needs.
44. I communicate in ways that demonstrate respect for the feelings, ideas, and contributions of others.
45. I believe it is important to learn about students and their community.

Formun Altı
