# Supplementary material
Source: Research Square preprint supplement (doi:10.21203/rs.3.rs-6662441/v1)
Supplement: Supplementary file 2 [file b17bba6ce597352fd72de470.docx]

Dear Participant,

This interview is conducted as part of a research study aiming to explore pre-service English language teachers’ views and reflections about teaching disposition and their development as future teachers. Your participation in this interview is entirely voluntary.

Before participating, please note that all information you share will be kept confidential and used only for academic research purposes. Your responses will be anonymized, and no personal identifying information will be included in any reports or publications. You may choose not to answer any question or withdraw from the interview at any time without any negative consequences.

By agreeing to participate, you confirm that you have been informed about the purpose of the study, understand your rights as a participant, and voluntarily consent to take part in this interview.

Thank you for your valuable contribution.

Dr. Gülten Genç

1- What does teaching disposition mean to you?

2- What are some general professional orientations (people vs things) do effective teacher have?

3- How can you define yourself as an effective teacher?

4- As a prospective teacher who is going to be an English after a while, do you believe that "teaching English as a profession" is a good choice for you?
